# Supplementary material
Source: PubMed Central journal article supplement (PMC3073857)
Supplement: NIHMS262942-supplement-1.pdf [file NIHMS262942-supplement-1.pdf]

**Supplementary Table 1.** Classification categories for causes of death.

---

| Causes of Death                                    |
|----------------------------------------------------|
| 1. Heart disease                                   |
| 2. Malignant neoplasm (not HCC)                    |
| 3. Cerebrovascular disease                         |
| 4. Chronic lower respiratory disease               |
| 5. Accidental (unintentional injuries)             |
| 6. Alzheimer's disease                             |
| 7. Diabetes mellitus                               |
| 8. Influenza and pneumonia                         |
| 9. Renal disease                                   |
| 10. Septicemia                                     |
| 11. Intentional self-harm (suicide)                |
| 12. Chronic liver disease and cirrhosis            |
| 13. Hepatocellular carcinoma (HCC)                 |
| 14. Other known cause                              |
| 15. Unable to determine (insufficient information) |

---
